# Supplementary material for: Assessment of serum free light chain measurements in a large Chinese chronic kidney disease cohort: a multicenter real-world study
Source: publisher site journal article supplement (doi:10.1515/cclm-2024-1226), 2025-04-11
Supplement: Supplementary file 1 [file j_cclm-2024-1226_suppl_001.docx]

***Defining Serum Free Light Chain Reference Ranges for*** ***Chinese Chronic Kidney Disease Patients: A Multicenter Real-World Data Analysis***

Xia Luoa, Xiaomeng Zhangb, Xu Yuana, Pan Zhaoa, Wenqian Zhanga, Lingyan Denga#, Liming Chenga#

aDepartment of Laboratory Medicine, Tongji Hospital, Tongji Medical College, Huazhong University of Science and Technology, Wuhan, China

bDivision of Nephrology, Tongji Hospital, Tongji Medical College, Huazhong University of Science and Technology, Wuhan, China

Table S1 Validation of the established reference ranges

| Center | Number of validation samples | ORR* (%) | | |
| --- | --- | --- | --- | --- |
| Kappa | Lambda | FLC ratio |
| **Caidian** |  |  |  |  |
| All | 848 | 37 (4.36) | 42 (4.95) | 47 (5.54) |
| 60-90 | 266 | 19 (7.14) | 20 (7.52) | 18 (6.77) |
| 45-59 | 154 | 6 (3.90) | 6 (3.90) | 5 (3.25) |
| 30-44 | 138 | 4 (2.90) | 10 (7.25) | 6 (4.35) |
| 15-29 | 171 | 7 (4.09) | 9 (5.26) | 7 (4.09) |
| <15 | 119 | 7 (5.88) | 8 (6.72) | 7 (5.88) |
| **High-Tech Development Zone** |  |  |  |  |
| All | 1308 | 74 (5.66) | 55 (4.20) | 66 (5.05) |
| 60-90 | 414 | 40 (9.66) | 29 (7.00) | 30 (7.25) |
| 45-59 | 210 | 17 (8.10) | 10 (4.76) | 6 (2.86) |
| 30-44 | 237 | 12 (5.06) | 17 (7.17) | 12 (5.06) |
| 15-29 | 253 | 10 (3.95) | 13 (5.14) | 8 (3.16) |
| <15 | 194 | 9 (4.64) | 7 (3.61) | 10 (5.15) |

*OOR, out of range, represents the proportions of validation sample results outside the reference ranges from the Hankou District. An OOR below 10% is considered acceptable [1].


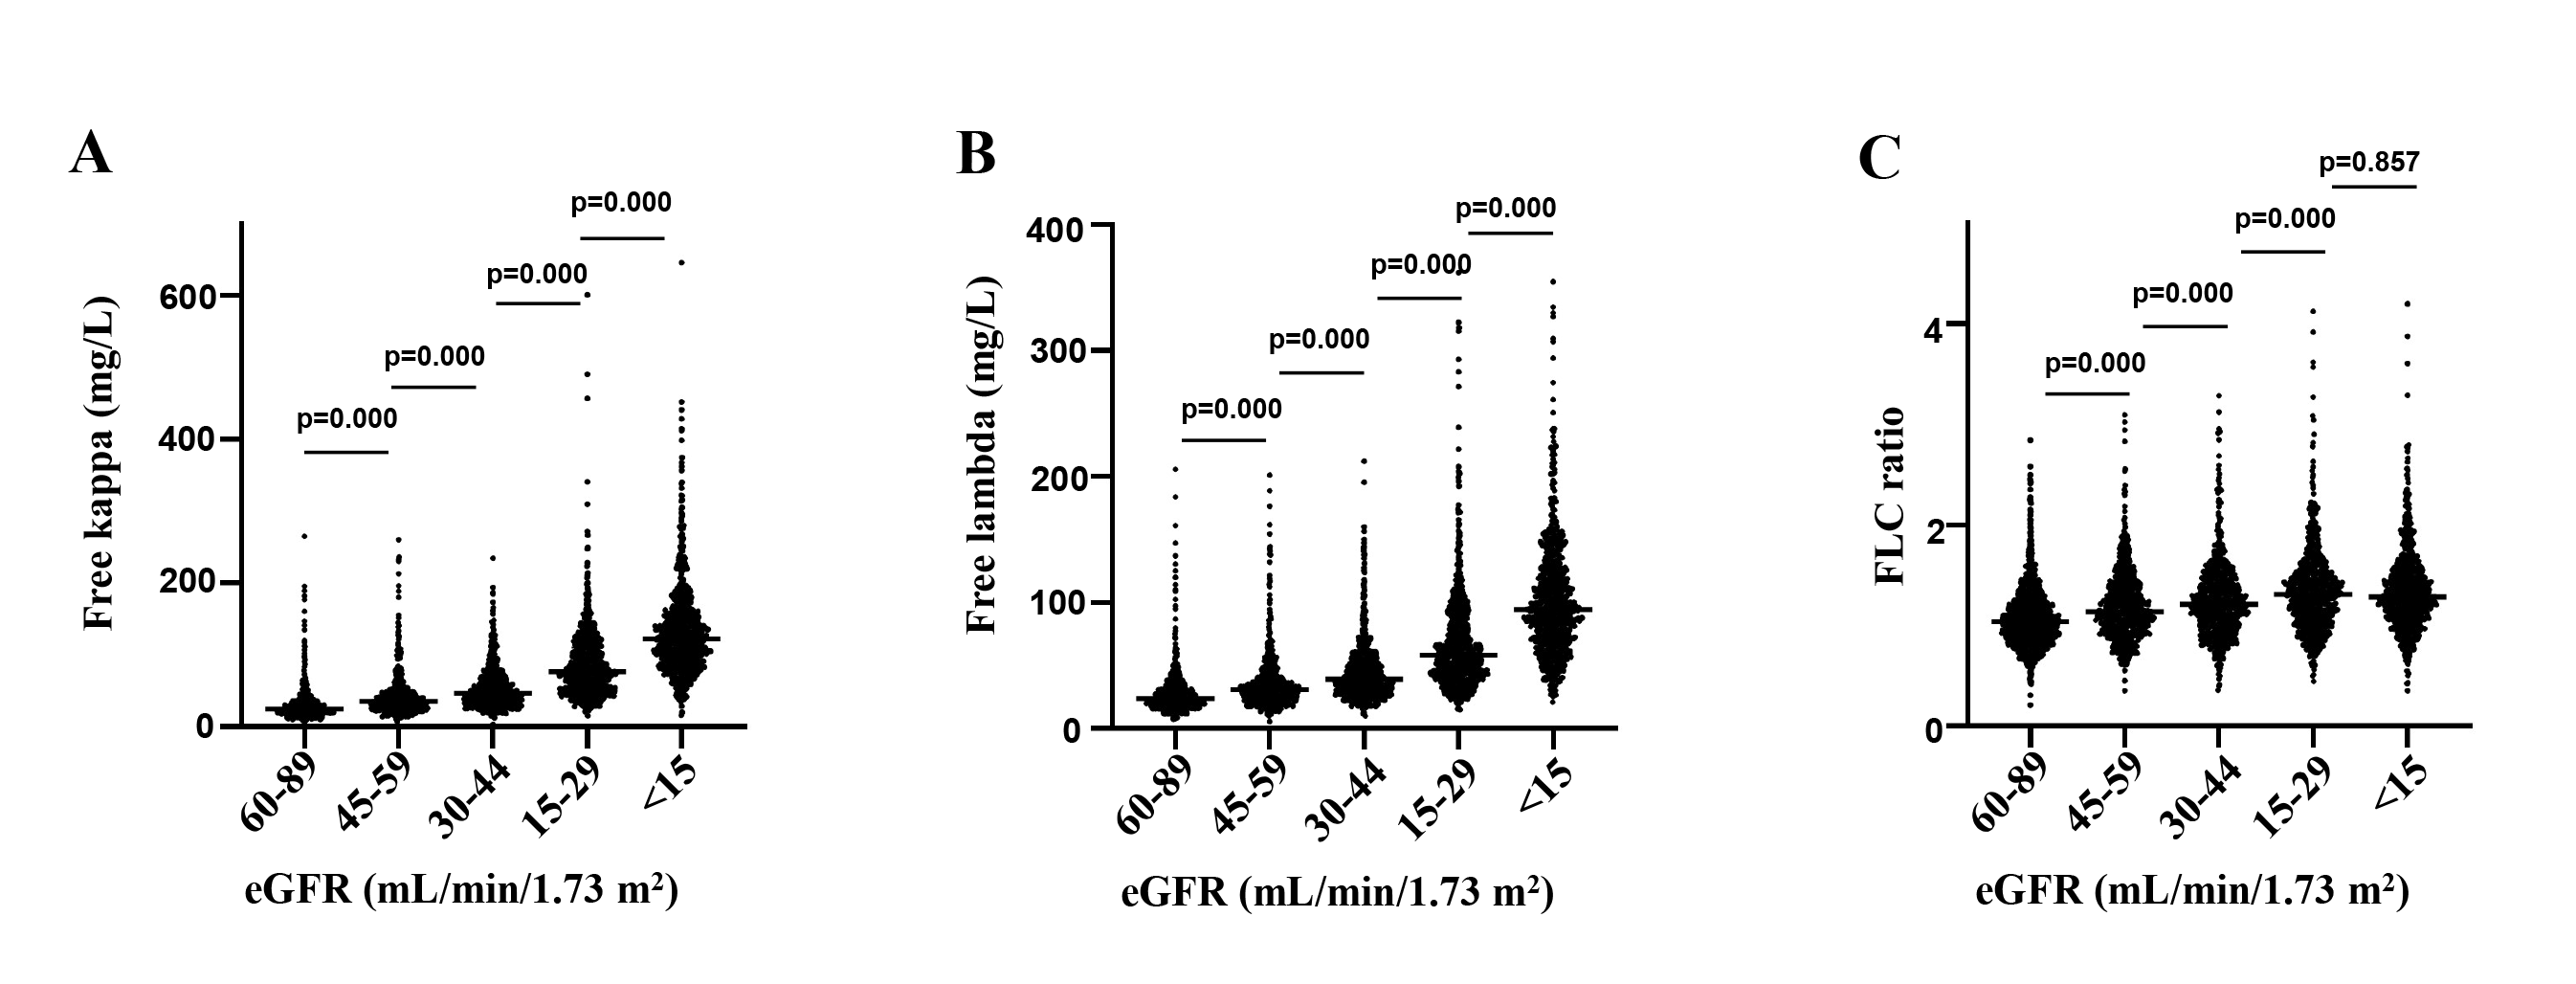


**Fig. S1 Serum FLC concentrations in CKD patients.**

1. The concentration of kappa light chains progressively increased as eGFR decreased. (B) The concentration of lambda light chains increased with declining eGFR. (C) FLC ratios shown a slight increase as CKD progressed.

**References**

1. CLSI. Deﬁning, establishing, and verifying reference intervals in the clinical laboratory; approved guideline. CLSI document EP28-A3c, 3rd ed. Wayne, PA: Clinical and Laboratory Standards Institute; 2008.
